# Supplementary material for: Sponge-derived polybrominated diphenyl ethers and dibenzo-p-dioxins, irreversible inhibitors of the bacterial α-d-galactosidase
Source: Royal Society of Chemistry journal article supplement (doi:10.1039/c9em00301k), 2019-01-01
Supplement: c9em00301k1.pdf [file c9em00301k1.pdf]

## Supporting information

### **Sponge-derived polybrominated diphenyl ethers and dibenzo-*p*-dioxins, irreversible inhibitors of the bacterial $\alpha$ -D-galactosidase**

Natalia K. Utkina,\*Galina N. Likhatskaya, LarisaA. Balabanova, and Irina Y.Bakunina\*

G.B. Elyakov Pacific Institute of Bioorganic Chemistry, Far Eastern Branch, Russian Academy  
of Sciences, Vladivostok 690022, Russian Federation

\* To whom correspondence should be addressed Tel: 7 (423) 231-11-68. Fax: 7 (423) 231-40-50.

E-mail: utkinan@mail.ru; E-mail: bakun@list.ru

## Contents

**Table S1.**  $^1\text{H}$ ,  $^{13}\text{C}$ NMR data of compounds **1-3**

**Table S2.**  $^1\text{H}$ ,  $^{13}\text{C}$ NMR data of compounds **4** and **5**

**Table S3.**  $^1\text{H}$ ,  $^{13}\text{C}$ NMR data of compounds **6-8**

**Table S1.**  $^1\text{H}$ ,  $^{13}\text{C}$ NMR data of compounds **1-3** ( $^1\text{H}$  NMR, 300 MHz;  $^{13}\text{C}$  NMR, 75 MHz)

| 1(DMSO- $d_6$ ) |                     | 2(DMSO- $d_6$ )                  |                     | 3(DMSO- $d_6$ )                  |                     |                                  |
|-----------------|---------------------|----------------------------------|---------------------|----------------------------------|---------------------|----------------------------------|
| position        | $\delta_{\text{C}}$ | $\delta_{\text{H}}$ ( $J$ in Hz) | $\delta_{\text{C}}$ | $\delta_{\text{H}}$ ( $J$ in Hz) | $\delta_{\text{C}}$ | $\delta_{\text{H}}$ ( $J$ in Hz) |
| 1               | 152.1               |                                  | 150.8               |                                  | 148.8               |                                  |
| 2               | 138.3               |                                  | 139.4               |                                  | 139.8               |                                  |
| 3               | 118.7               |                                  | 121.6               |                                  | 117.2               |                                  |
| 4               | 125.1               | 7.40 (1H, $d$ , 2.4)             | 116.0               |                                  | 125.2               |                                  |
| 5               | 118.0               |                                  | 121.6               |                                  | 119.8               |                                  |
| 6               | 119.5               | 7.15 (1H, $d$ , 2.4)             | 120.5               | 7.45(1H, s)                      | 115.8               |                                  |
| 1'              | 152.6               |                                  | 152.3               |                                  | 152.0               |                                  |
| 2'              | 111.6               |                                  | 111.8               |                                  | 112.1               |                                  |
| 3'              | 135.0               | 7.88 (1H, $d$ , 2.4)             | 135.1               | 7.90(1H, $d$ , 2.4)              | 135.0               | 7.79 (1H, $d$ , 2.4)             |
| 4'              | 114.0               |                                  | 114.0               |                                  | 114.3               |                                  |
| 5'              | 131.3               | 7.40 (1H, $dd$ , 9.0, 2.4)       | 131.7               | 7.40(1H, $dd$ , 8.8, 2.4)        | 131.6               | 7.29 (1H, $dd$ , 8.8, 2.4)       |
| 6'              | 116.1               | 6.46 (1H, $d$ , 9.0)             | 115.9               | 6.51(1H, $d$ , 8.8)              | 116.1               | 6.42 (1H, $d$ , 8.8)             |
|                 |                     | 10.80 (1H, brs, OH)              |                     | 10.96 (1H, brs, OH)              |                     | 10.94(1H, brs, OH)               |

  

|  |  |  |
|--|--|--|
|  |  |  |
|--|--|--|

**Table S2.**  $^1\text{H}$ ,  $^{13}\text{C}$ NMR data of compounds **4** and **5** ( $^1\text{H}$  NMR, 300 MHz;  $^{13}\text{C}$  NMR, 75 MHz,)

| <b>4</b>       |                                    | <b>5(DMSO-<math>d_6</math>)</b>                     |                     |                                  |
|----------------|------------------------------------|-----------------------------------------------------|---------------------|----------------------------------|
| position       | $\delta_{\text{C}}$ (DMSO- $d_6$ ) | $\delta_{\text{H}}$ ( $J$ in Hz)( $\text{CDCl}_3$ ) | $\delta_{\text{C}}$ | $\delta_{\text{H}}$ ( $J$ in Hz) |
| 1              | 151.5                              |                                                     | 148.8               |                                  |
| 2              | 137.7                              |                                                     | 139.4               |                                  |
| 3              | 117.5                              |                                                     | 125.5               |                                  |
| 4              | 125.0                              | 7.45 (1H, <i>d</i> , 2.0)                           | 120.4               |                                  |
| 5              | 118.4                              |                                                     | 117.4               |                                  |
| 6              | 119.6                              | 7.18 (1H, <i>d</i> , 2.0)                           | 115.7               |                                  |
| 1'             | 150.8                              |                                                     | 145.8               |                                  |
| 2'             | 144.8                              |                                                     | 144.0               |                                  |
| 3'             | 118.1                              |                                                     | 111.2               |                                  |
| 4'             | 127.8                              | 7.45 (1H, <i>d</i> , 2.0)                           | 128.5               | 7.29 (1H, <i>d</i> , 2.4)        |
| 5'             | 115.5                              |                                                     | 109.4               |                                  |
| 6'             | 116.3                              | 6.77 (1H, <i>d</i> , 2.0)                           | 115.5               | 6.42 (1H, <i>d</i> , 2.4)        |
| $\text{OCH}_3$ | 60.40                              | 4.03( <i>s</i> )<br>6.65 ( <i>s</i> , OH)           |                     | 10.91( <i>brs</i> , OH)          |

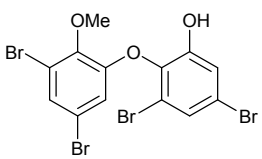



**Table S3.**  $^1\text{H}$ ,  $^{13}\text{C}$ NMR data of compounds **6-8** ( $^1\text{H}$  NMR, 300 MHz;  $^{13}\text{C}$  NMR, 75 MHz,)

| 6(DMSO- $d_6$ ) |                     | 7(DMSO- $d_6$ )                  |                     | 8(DMSO- $d_6$ )                  |                     |                                  |
|-----------------|---------------------|----------------------------------|---------------------|----------------------------------|---------------------|----------------------------------|
| position        | $\delta_{\text{C}}$ | $\delta_{\text{H}}$ ( $J$ in Hz) | $\delta_{\text{C}}$ | $\delta_{\text{H}}$ ( $J$ in Hz) | $\delta_{\text{C}}$ | $\delta_{\text{H}}$ ( $J$ in Hz) |
| 1               | 146.8               |                                  | 144.1               |                                  | 145.7               |                                  |
| 2               | 115.6               | 6.73 (1H, $d$ , 2.1)             | 109.7               |                                  | 116.3               | 6.93 (1H, $s$ )                  |
| 3               | 114.7               |                                  | 117.9               |                                  | 117.9               |                                  |
| 4               | 109.7               | 6.64 (1H, $d$ , 2.1)             | 111.1               | 6.94 (1H, $s$ )                  | 101.3               |                                  |
| 4a              | 142.3               |                                  | 140.9               |                                  | 140.2               |                                  |
| 10a             | 129.2               |                                  | 129.9               |                                  | 129.7               |                                  |
| 5a              | 138.3               |                                  | 138.2               |                                  | 138.4               |                                  |
| 6               | 110.2               |                                  | 110.3               |                                  | 110.3               |                                  |
| 7               | 129.5               | 7.43 (1H, $d$ , 2.4)             | 129.8               | 7.14 (1H, $d$ , 2.2)             | 129.7               | 7.17 (1H, $d$ , 2.1)             |
| 8               | 115.4               |                                  | 115.4               |                                  | 115.9               |                                  |
| 9               | 118.9               | 7.18 (1H, $d$ , 2.4)             | 118.8               | 7.47 (1H, $d$ , 2.2)             | 118.7               | 7.43 (1H, $d$ , 2.1)             |
| 9a              | 142.8               |                                  | 142.4               |                                  | 142.4               |                                  |

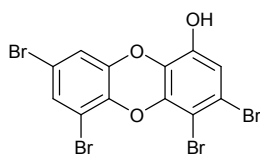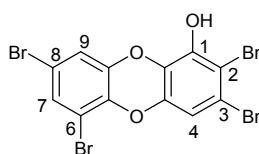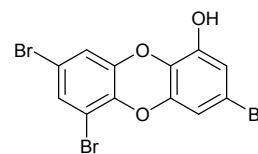

$^1\text{H}$  NMR and  $^{13}\text{C}$  NMR spectra were recorded on a Bruker AVANCE DPX-300 MHz NMR spectrometer
